# Supplementary material for: High feasibility of salivary therapeutic drug monitoring in linezolid, but less in tedizolid: A single-dose study in healthy subjects
Source: bioRxiv or medRxiv preprint supplement (doi:10.1101/2024.06.30.24309749), 2024-07-01

**Figure S5**

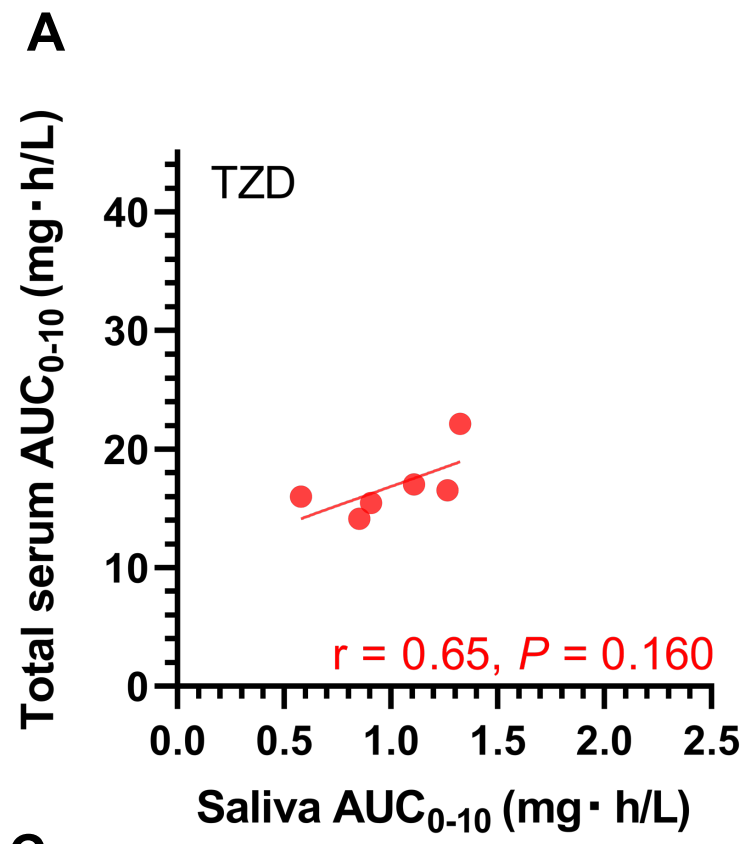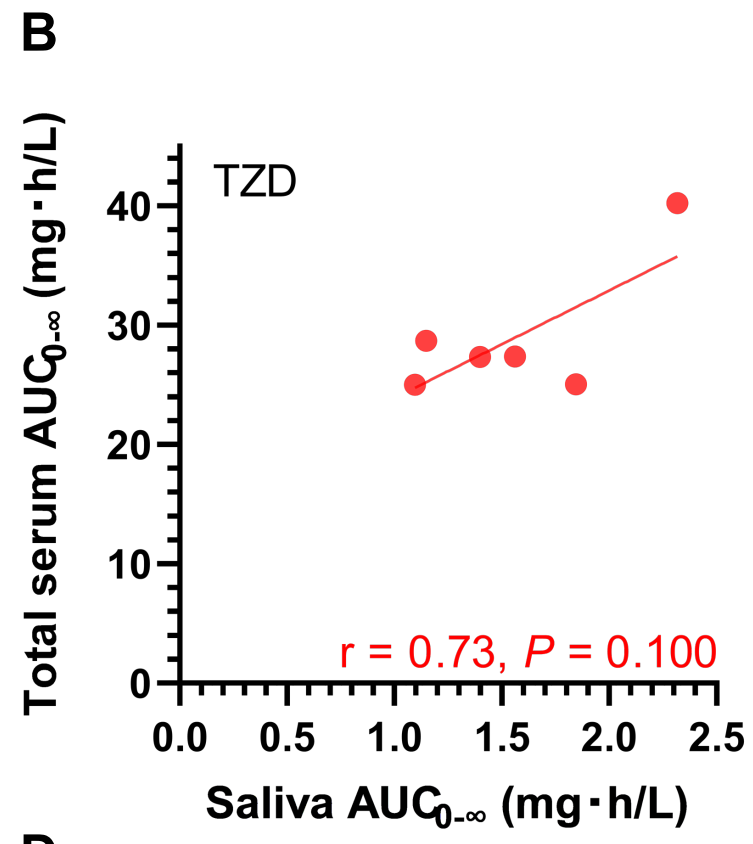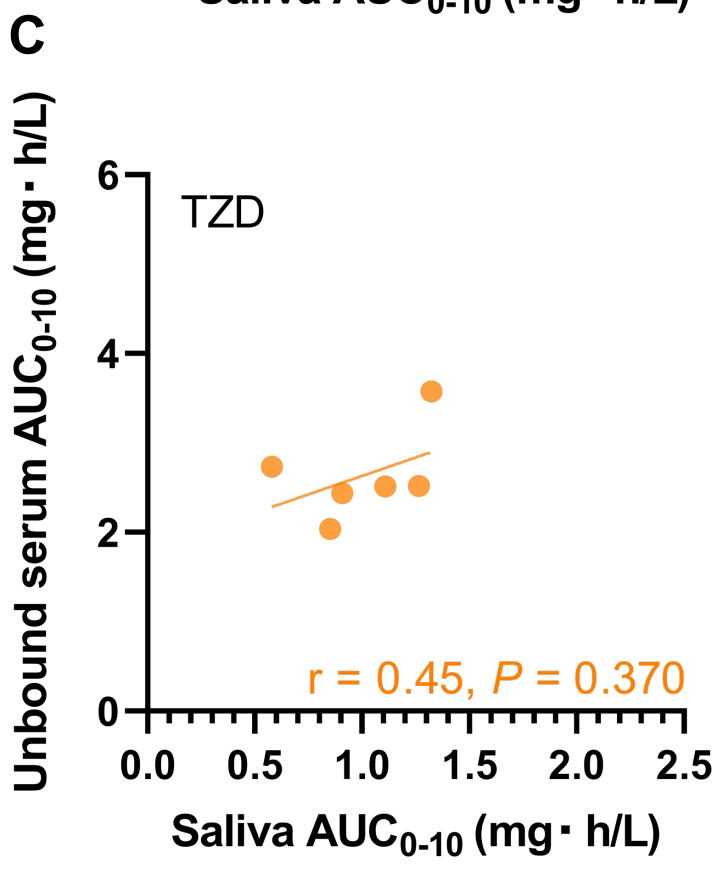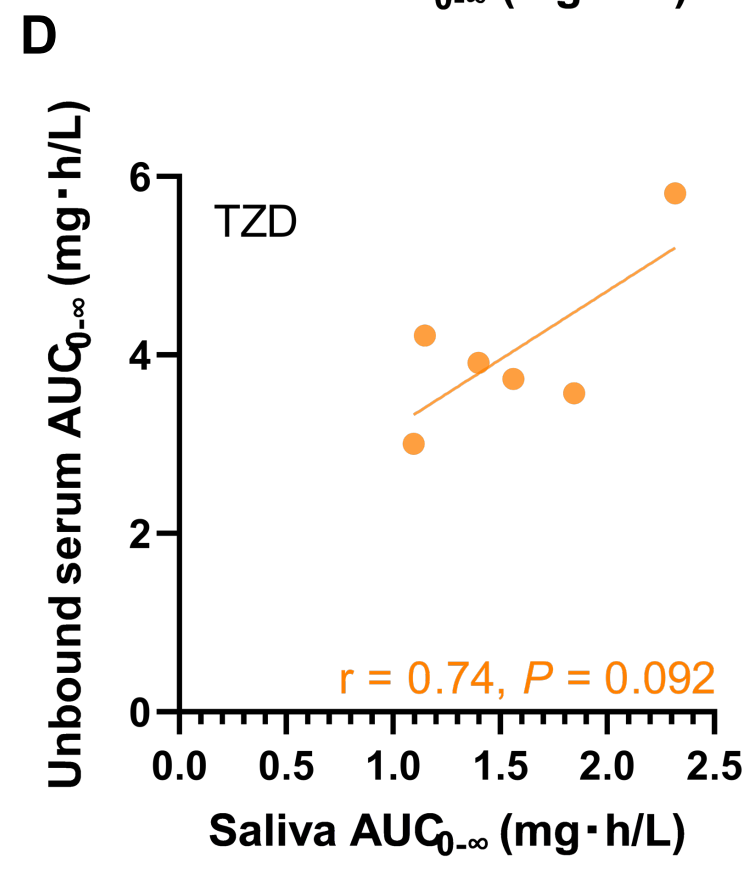

Supplement: Supplementary file [file media-5.pdf]
